# Supplementary material for: Narrowing the band of green emission in manganese hybrids by reducing the hydrogen bond strength and structural distortion
Source: Royal Society of Chemistry journal article supplement (doi:10.1039/d2tc03481f), 2022-01-01
Supplement: d2tc03481f1.pdf [file d2tc03481f1.pdf]

Supporting Information for:

# Narrowing the band of green emission in manganese hybrid by reducing the hydrogen bond strength and structural distortion

Jiawei Lin,<sup>a</sup> Muwei Zhang,<sup>a</sup> Niu Sun,<sup>a</sup> Shihui He,<sup>b</sup> Xusheng Zhang,<sup>b</sup> Zhongnan Guo,<sup>\*a</sup> Jing Zhao,<sup>b</sup>

Quanlin Liu,<sup>b</sup> and Wenxia Yuan,<sup>\*a</sup>

<sup>a</sup> Department of Chemistry, School of Chemistry and Biological Engineering, University of Science and Technology Beijing, Beijing, 100083, China

<sup>b</sup> The Beijing Municipal Key Laboratory of New Energy Materials and Technologies, School of Materials Sciences and Engineering, University of Science and Technology Beijing, Beijing, 100083,

China

# CONTENTS

|                                                                                                                                                                                                                               |    |
|-------------------------------------------------------------------------------------------------------------------------------------------------------------------------------------------------------------------------------|----|
| <b>Table S1.</b> Crystal data and structure refinement of (MDPA) <sub>2</sub> MnBr <sub>4</sub> and (MTPP) <sub>2</sub> MnBr <sub>4</sub> .                                                                                   | S3 |
| <b>Figure S1.</b> ORTEP plots for (a) (MDPA) <sub>2</sub> MnBr <sub>4</sub> and (b) (MTPP) <sub>2</sub> MnBr <sub>4</sub> .                                                                                                   | S5 |
| <b>Figure S2.</b> The EDS analysis results for (a) (MDPA) <sub>2</sub> MnBr <sub>4</sub> and (b) (MTPP) <sub>2</sub> MnBr <sub>4</sub> .                                                                                      | S5 |
| <b>Figure S3.</b> Mn-Br bond lengths of [MnBr <sub>4</sub> ] <sup>2-</sup> in (MDPA) <sub>2</sub> MnBr <sub>4</sub> and (MTPP) <sub>2</sub> MnBr <sub>4</sub> .                                                               | S5 |
| <b>Figure S4.</b> The coordinates of (MDPA) <sub>2</sub> MnBr <sub>4</sub> , (MTPP) <sub>2</sub> MnBr <sub>4</sub> and NTSC-green standard in CIE 1931 system.                                                                | S6 |
| <b>Figure S5.</b> PLQYs of (MDPA) <sub>2</sub> MnBr <sub>4</sub> and (MTPP) <sub>2</sub> MnBr <sub>4</sub> .                                                                                                                  | S6 |
| <b>Figure S6.</b> Comparison of the PL spectra of the as-prepared (a) (MDPA) <sub>2</sub> MnBr <sub>4</sub> and (b) (MTPP) <sub>2</sub> MnBr <sub>4</sub> and the ones of samples exposed in the air for 1 month.             | S7 |
| <b>Figure S7.</b> Relationship between the fwhm values and the bond angle distortion degree ( $\delta_{tet}^2$ ) in 0D Mn(II) tetrabromide hybrids.                                                                           | S7 |
| <b>Figure S8.</b> The thermal activation energy $\Delta E$ of (a) (MDPA) <sub>2</sub> MnBr <sub>4</sub> and (b) (MTPP) <sub>2</sub> MnBr <sub>4</sub> analyzed by using the Arrhenius equation.                               | S7 |
| <b>Figure S9.</b> Temperature-dependent PL decay curves and lifetimes of (a) (MDPA) <sub>2</sub> MnBr <sub>4</sub> and (b) (MTPP) <sub>2</sub> MnBr <sub>4</sub> .                                                            | S8 |
| <b>Figure S10.</b> Photographs of the TL light captured from crystals of (MDPA) <sub>2</sub> MnBr <sub>4</sub> (left) and (MTPP) <sub>2</sub> MnBr <sub>4</sub> (right) upon grinding with a glass rod at ambient conditions. | S8 |

**Table S1.** Crystal data and structure refinement of (MDPA)<sub>2</sub>MnBr<sub>4</sub> and (MTPP)<sub>2</sub>MnBr<sub>4</sub>.

| Empirical formula                                   | (C <sub>13</sub> H <sub>14</sub> N) <sub>2</sub> MnBr <sub>4</sub>                                                                               | (C <sub>19</sub> H <sub>18</sub> N) <sub>2</sub> MnBr <sub>4</sub>                                                                    |
|-----------------------------------------------------|--------------------------------------------------------------------------------------------------------------------------------------------------|---------------------------------------------------------------------------------------------------------------------------------------|
| Formula weight                                      | 743.08                                                                                                                                           | 929.19                                                                                                                                |
| Temperature                                         | 150.0 K                                                                                                                                          |                                                                                                                                       |
| Wavelength                                          | 0.71073 Å                                                                                                                                        |                                                                                                                                       |
| Crystal system                                      | triclinic                                                                                                                                        | monoclinic                                                                                                                            |
| Space group                                         | <i>P</i> 1                                                                                                                                       | <i>P</i> 2 <sub>1</sub>                                                                                                               |
| Unit cell dimensions                                | <i>a</i> = 8.3674(4) Å, <i>α</i> = 87.103(2)°<br><i>b</i> = 8.5704(4) Å, <i>β</i> = 67.081(2)°<br><i>c</i> = 10.6100(5) Å, <i>γ</i> = 86.628(2)° | <i>a</i> = 9.7629(6) Å, <i>α</i> = 90°<br><i>b</i> = 12.4204(6) Å, <i>β</i> = 105.027(2)°<br><i>c</i> = 16.5351(10) Å, <i>γ</i> = 90° |
| Volume                                              | 699.27(6) Å <sup>3</sup>                                                                                                                         | 1936.47(19) Å <sup>3</sup>                                                                                                            |
| <i>Z</i>                                            | 1                                                                                                                                                | 2                                                                                                                                     |
| Density (calculated)                                | 1.765 g/cm <sup>3</sup>                                                                                                                          | 1.594 g/cm <sup>3</sup>                                                                                                               |
| Absorption coefficient                              | 6.203 mm <sup>-1</sup>                                                                                                                           | 4.575 mm <sup>-1</sup>                                                                                                                |
| <i>F</i> (000)                                      | 363                                                                                                                                              | 918                                                                                                                                   |
| Crystal size                                        | 0.22×0.18×0.18 mm <sup>3</sup>                                                                                                                   | 0.15×0.15×0.12 mm <sup>3</sup>                                                                                                        |
| <i>θ</i> range for data collection                  | 3.213 to 26.426°                                                                                                                                 | 2.077 to 26.394°                                                                                                                      |
| Index ranges                                        | -10 ≤ <i>h</i> ≤ 10<br>-10 ≤ <i>k</i> ≤ 10<br>-13 ≤ <i>l</i> ≤ 13                                                                                | -12 ≤ <i>h</i> ≤ 12<br>-15 ≤ <i>k</i> ≤ 15<br>-20 ≤ <i>l</i> ≤ 20                                                                     |
| Reflections collected                               | 16228                                                                                                                                            | 22338                                                                                                                                 |
| Independent reflections                             | 5619 [Rint = 0.0261]                                                                                                                             | 7870 [Rint = 0.0402]                                                                                                                  |
| Completeness                                        | 98.1%                                                                                                                                            | 99.9%                                                                                                                                 |
| Refinement method                                   | Full-matrix least-squares on <i>F</i> <sup>2</sup>                                                                                               |                                                                                                                                       |
| Data / restraints / parameters                      | 5619/3/289                                                                                                                                       | 7870/1/408                                                                                                                            |
| Goodness-of-fit                                     | 1.054                                                                                                                                            | 0.910                                                                                                                                 |
| Flack factor                                        | 0.043(13)                                                                                                                                        | 0.013(6)                                                                                                                              |
| Final <i>R</i> indices [ <i>I</i> > 2σ( <i>I</i> )] | <i>R</i> <sub>obs</sub> = 0.0302, <i>wR</i> <sub>obs</sub> = 0.0727                                                                              | <i>R</i> <sub>obs</sub> = 0.0320, <i>wR</i> <sub>obs</sub> = 0.0517                                                                   |
| <i>R</i> indices [all data]                         | <i>R</i> <sub>all</sub> = 0.0341, <i>wR</i> <sub>all</sub> = 0.0740                                                                              | <i>R</i> <sub>all</sub> = 0.0507, <i>wR</i> <sub>all</sub> = 0.0563                                                                   |
| Largest diff. peak and hole                         | 0.708 and -0.413 e·Å <sup>-3</sup>                                                                                                               | 0.320 and -0.267 e·Å <sup>-3</sup>                                                                                                    |

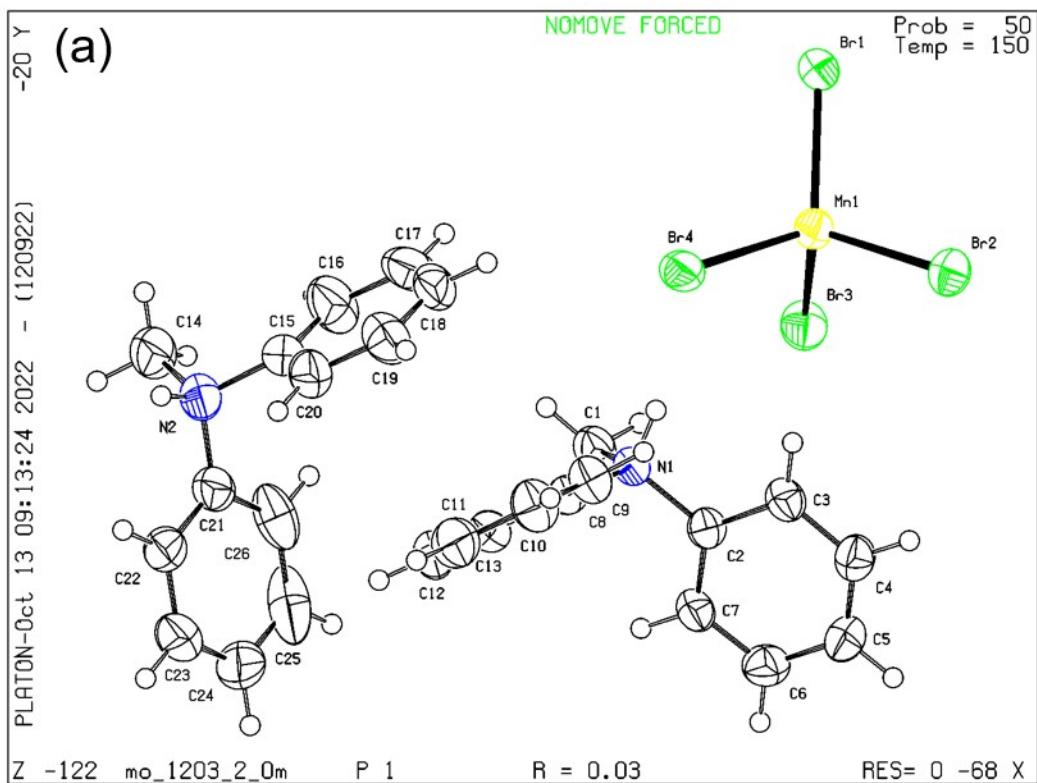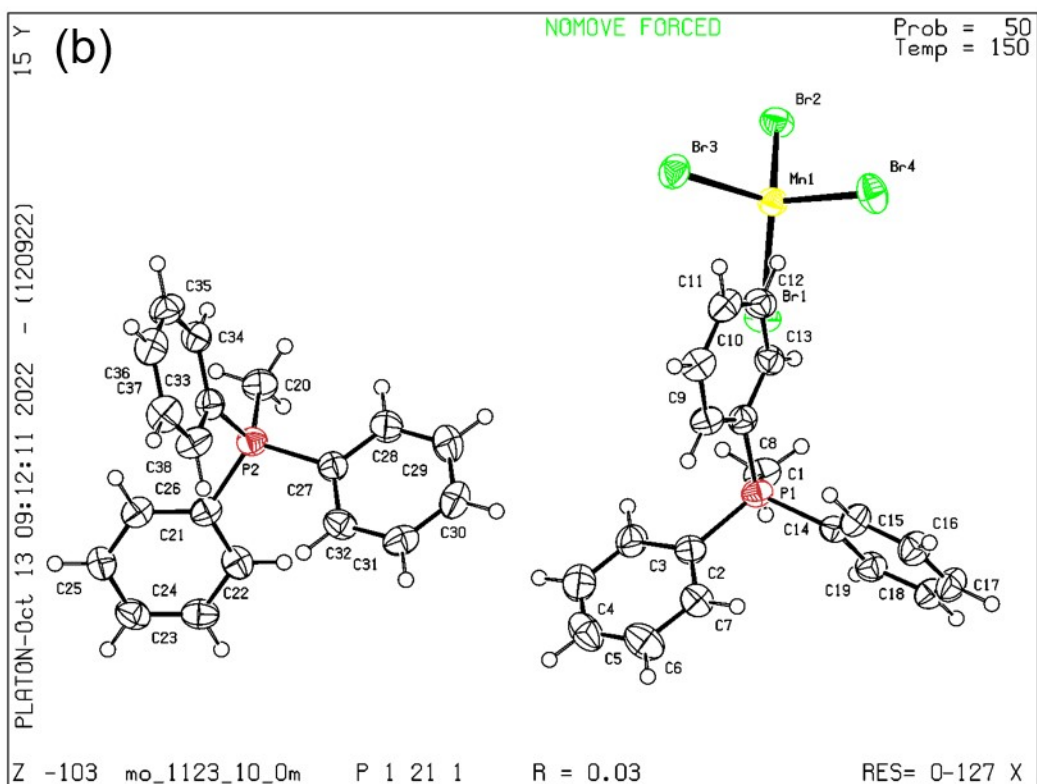

**Figure S1.** Oak Ridge thermal ellipsoid plots (ORTEP) for (a)  $(\text{MDPA})_2\text{MnBr}_4$  and (b)  $(\text{MTPP})_2\text{MnBr}_4$ .

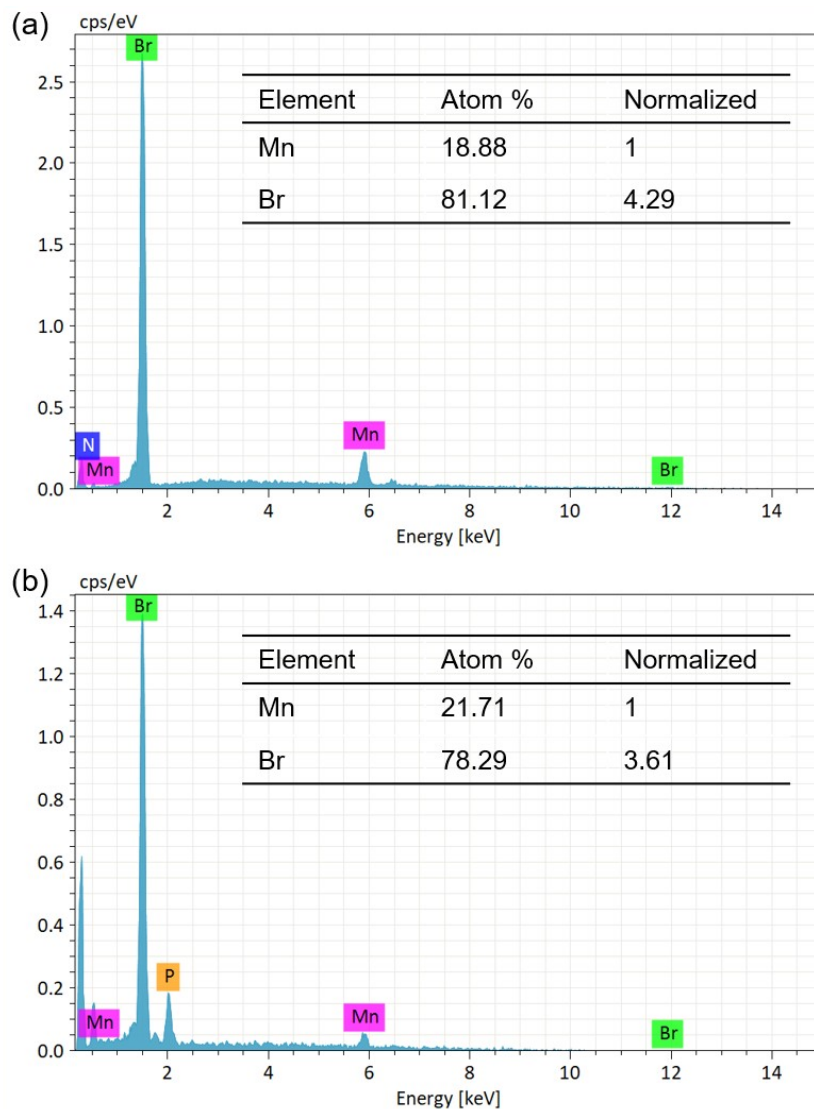

**Figure S2.** Element analysis results via EDS for (a)  $(\text{MDPA})_2\text{MnBr}_4$  and (b)  $(\text{MTPP})_2\text{MnBr}_4$ .

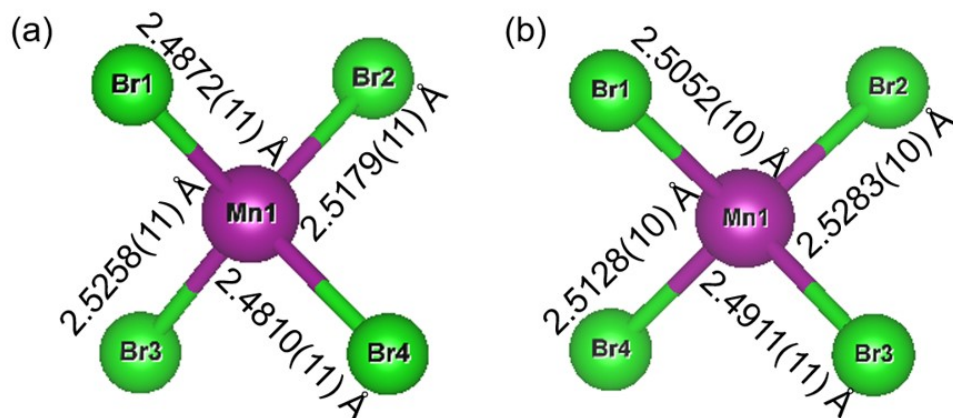

**Figure S3.** Mn-Br bond lengths of  $[\text{MnBr}_4]^{2-}$  in (a)  $(\text{MDPA})_2\text{MnBr}_4$  and (b)  $(\text{MTPP})_2\text{MnBr}_4$ .

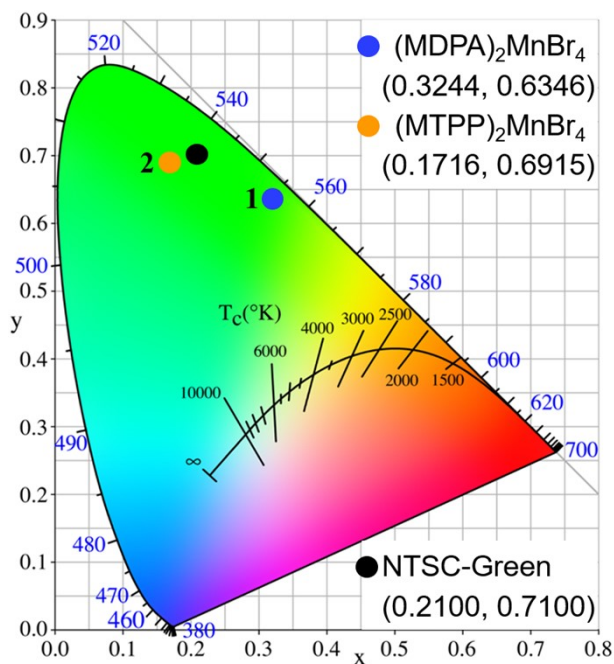

**Figure S4.** The coordinates of  $(\text{MDPA})_2\text{MnBr}_4$ ,  $(\text{MTPP})_2\text{MnBr}_4$  and NTSC-green standard in CIE 1931 system.

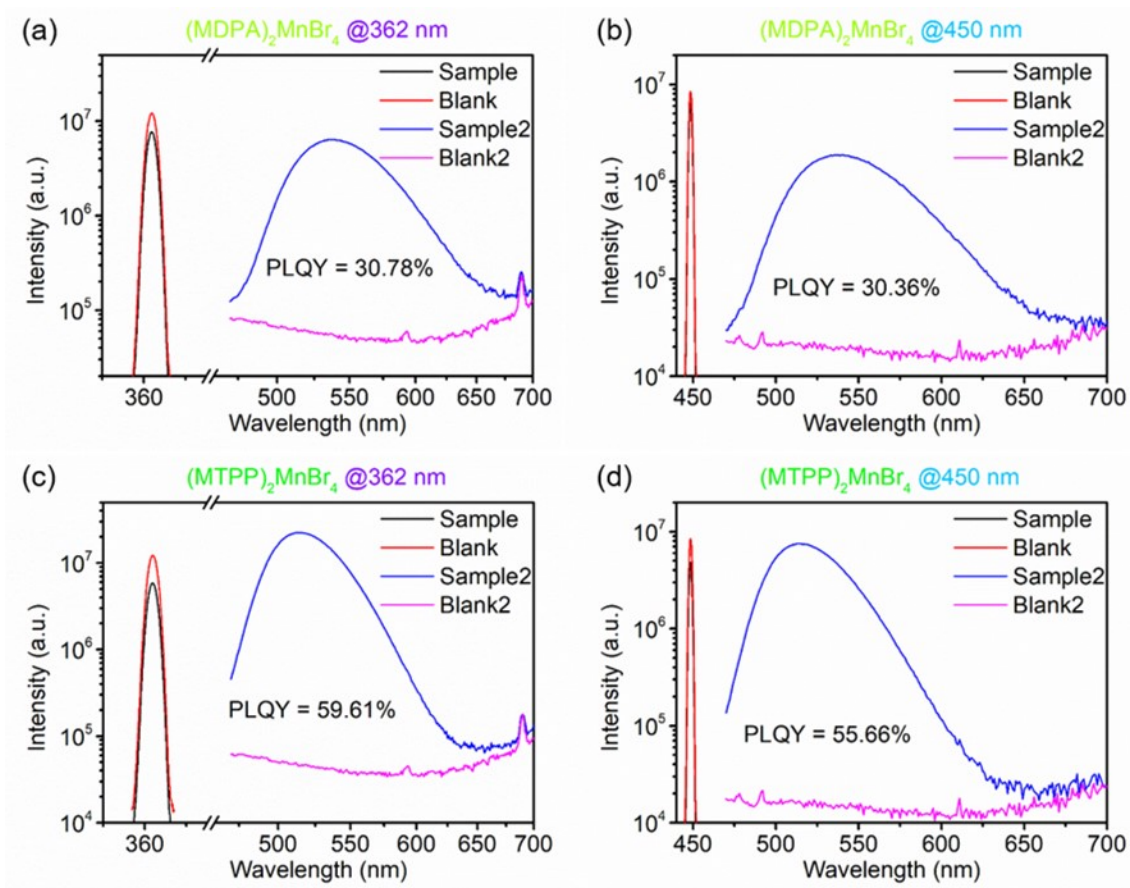

**Figure S5.** PLQY experimental data of (a) (b)  $(\text{MDPA})_2\text{MnBr}_4$ , and (c) (d)  $(\text{MTPP})_2\text{MnBr}_4$ .

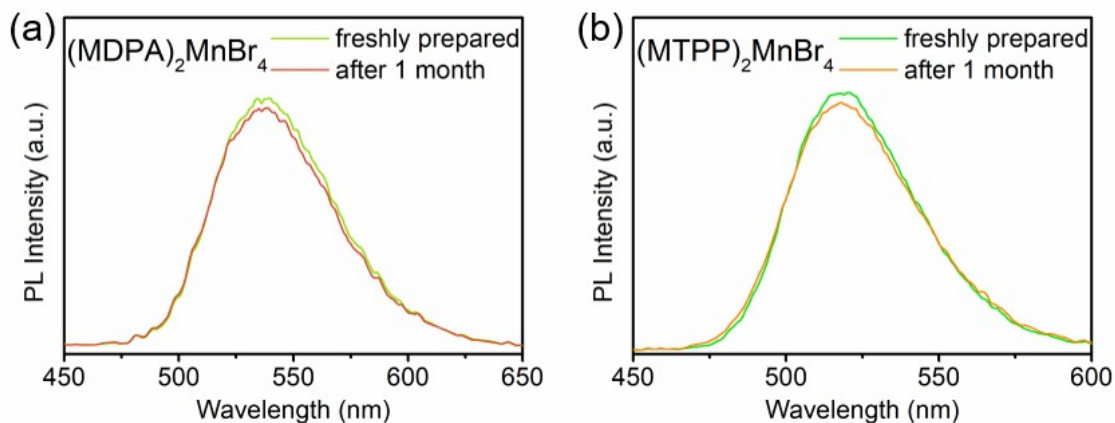

**Figure S6.** Comparison of the PL spectra of the as-prepared **1** (a) and **2** (b) and the ones of samples exposed in the air for 1 month.

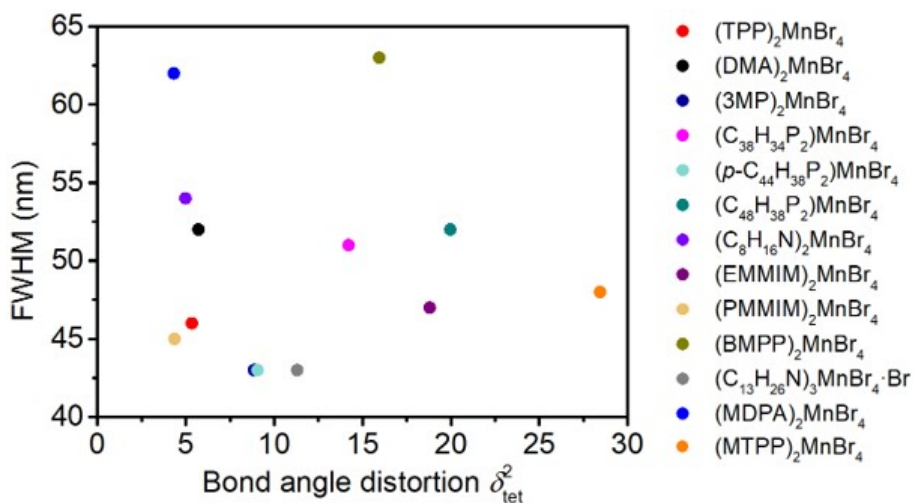

**Figure S7.** Relationship between the fwhm values and the bond angle distortion degree ( $\delta_{tet}^2$ ) in 0D Mn(II) tetrabromide hybrids.

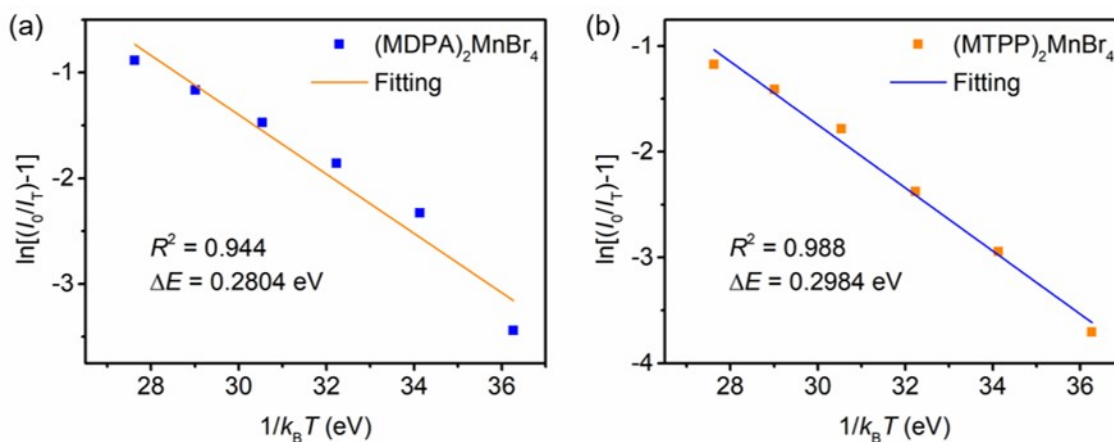

**Figure S8.** The thermal activation energy  $\Delta E$  of (a)  $(\text{MDPA})_2\text{MnBr}_4$  and (b)  $(\text{MTPP})_2\text{MnBr}_4$  analyzed by using the Arrhenius equation.



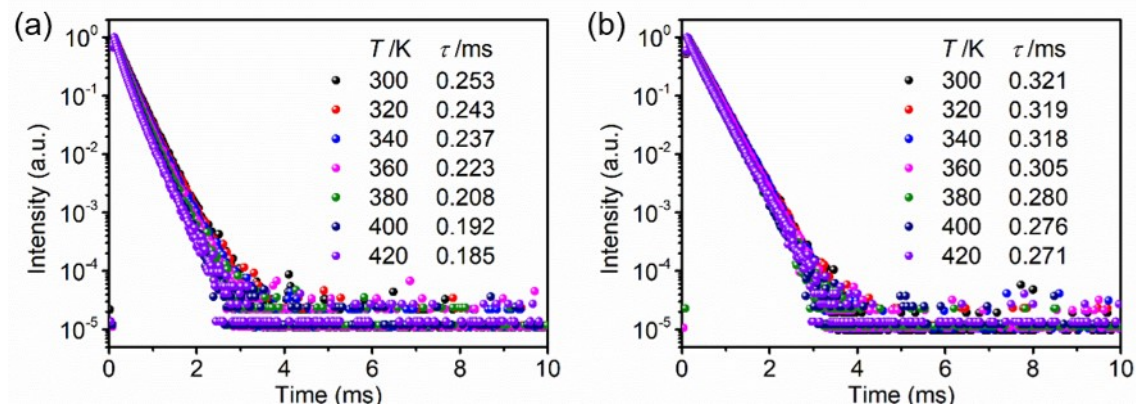

**Figure S9.** Temperature-dependent PL decay curves and lifetimes of (a)  $(\text{MDPA})_2\text{MnBr}_4$  and (b)  $(\text{MTPP})_2\text{MnBr}_4$ .

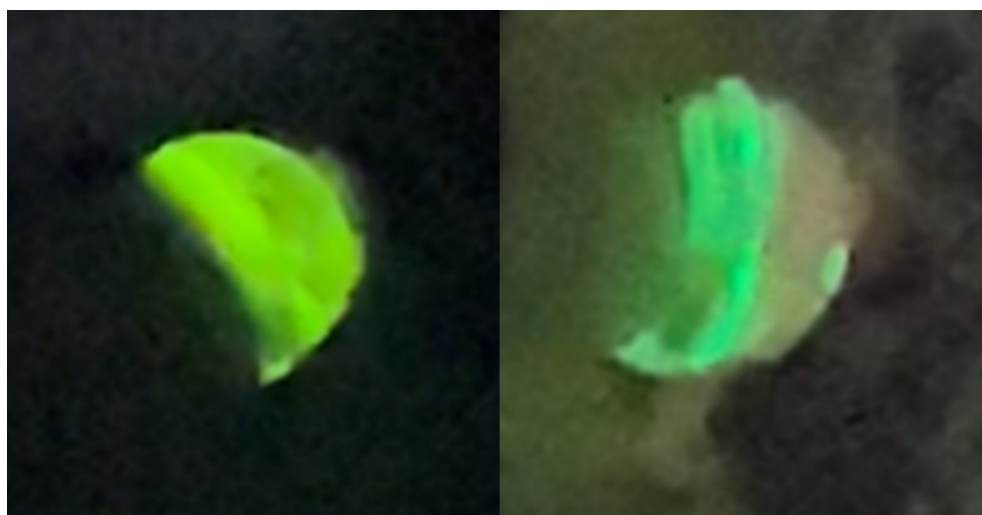

**Figure S10.** Photographs of the TL light captured from crystals of  $(\text{MDPA})_2\text{MnBr}_4$  (left) and  $(\text{MTPP})_2\text{MnBr}_4$  (right) upon grinding with a glass rod at ambient conditions.
